# Supplementary material
Source: HighWire-hosted journal article supplement (http://qualitysafety.bmj.com/highwire/filestream/157964/field_highwire_adjunct_files/0/bmjqs-2019-009680supp001_data_supplement.pdf)

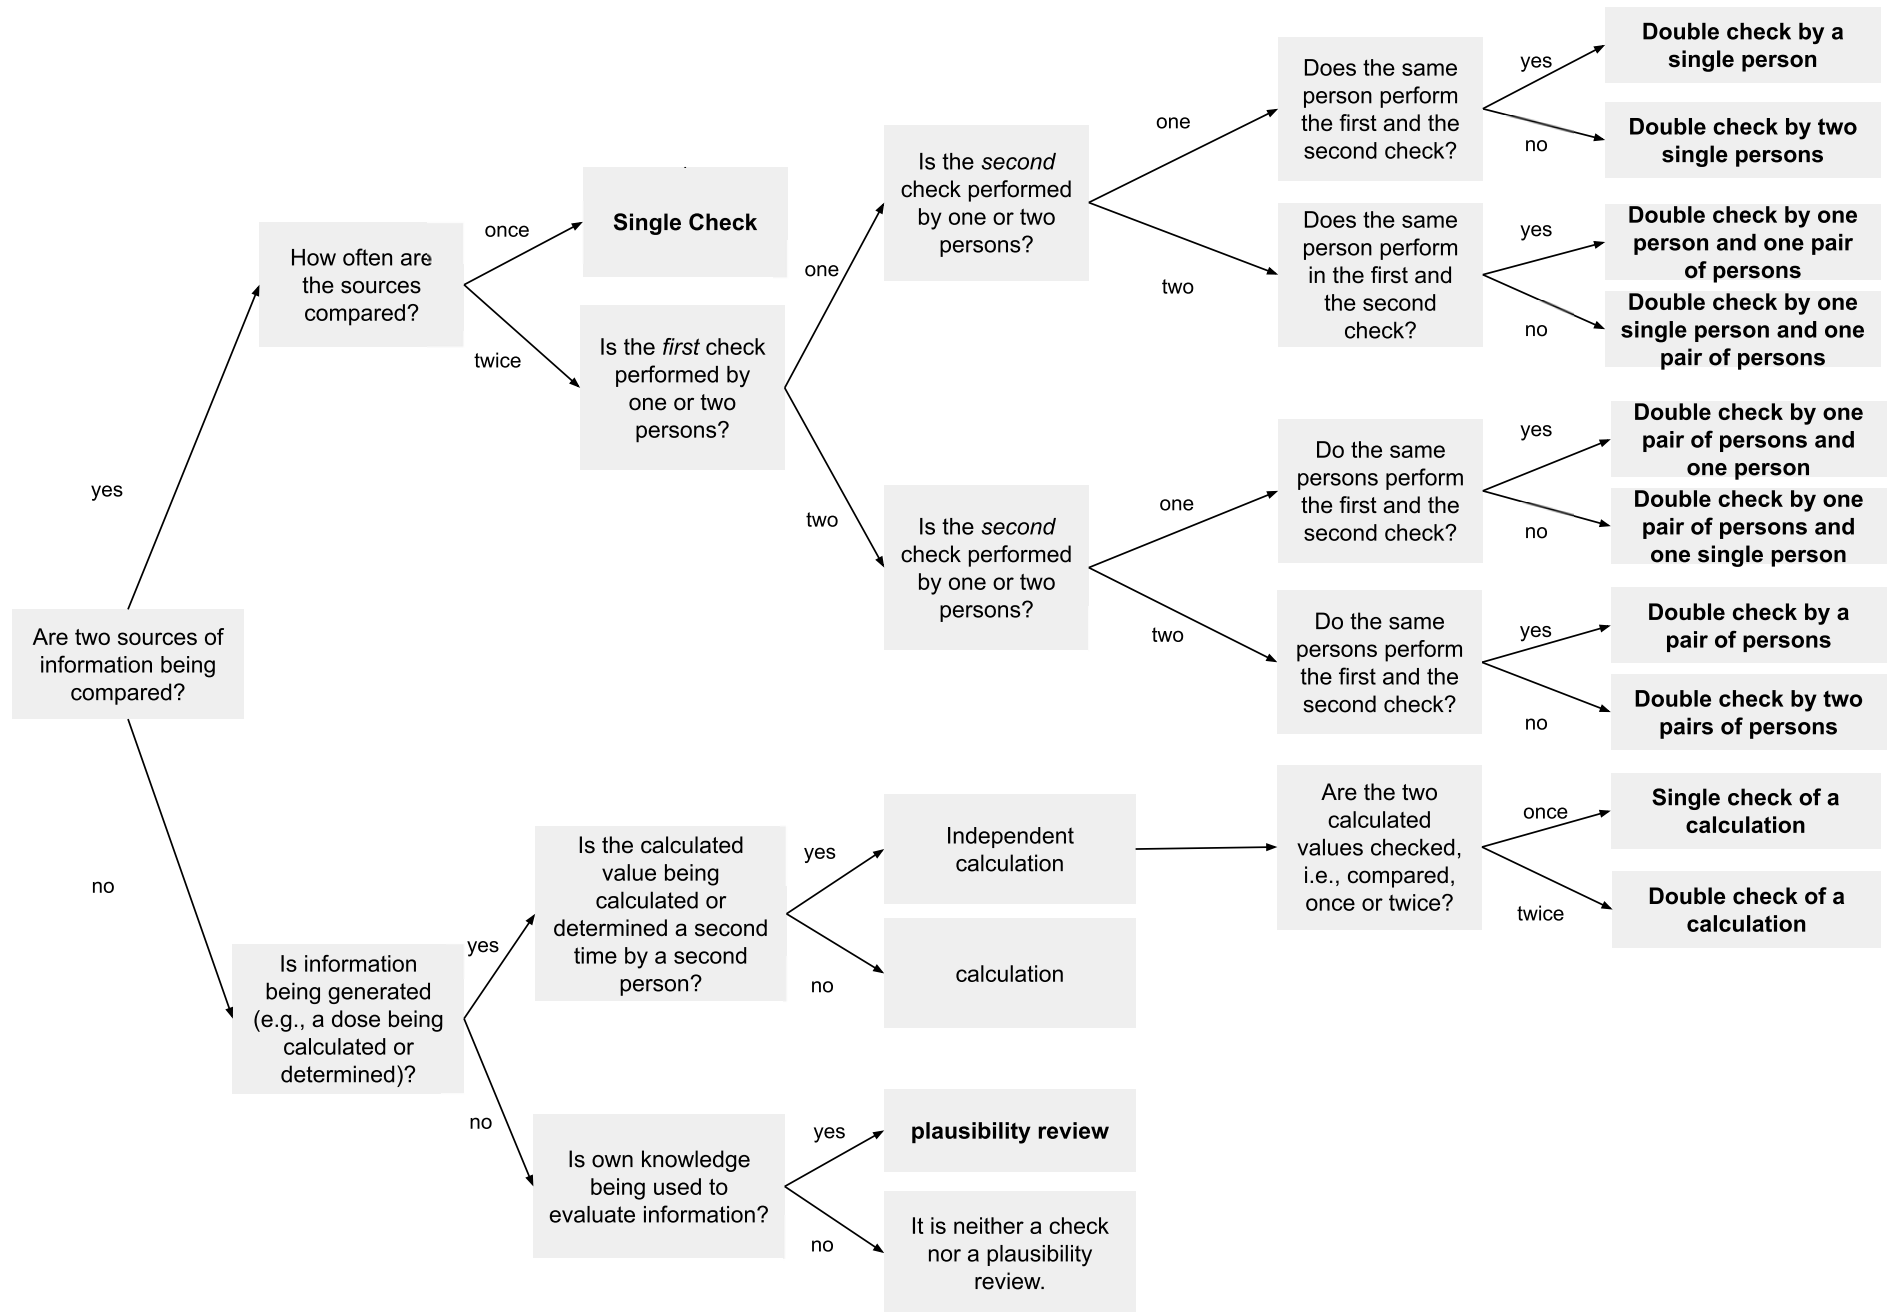

Supplement: bmjqs-2019-009680supp001_data_supplement.pdf [file bmjqs-2019-009680supp001_data_supplement.pdf]
